# Supplementary material for: Facile synthesis of water-soluble silver nanoclusters for the photocatalytic degradation of dyes by multivariate optimization approach
Source: Royal Society of Chemistry journal article supplement (doi:10.1039/d3na00227f), 2023-01-01
Supplement: d3na00227f1.pdf [file d3na00227f1.pdf]

## Supporting Information

### **Facile synthesis of water-soluble silver nanocluster for photocatalytic degradation of dye by multivariate optimization approach**

Saif Ullah,<sup>a</sup> Qinzhen Li,<sup>a</sup> Rooh Ullah,<sup>d</sup> Sadat Anwar,<sup>a, b, c</sup> Muhammad Fazal Hameed,<sup>e</sup> and Manzhou Zhu<sup>\*a</sup>

<sup>a</sup> Institutes of Physical Science and Information Technology and Centre for Atomic Engineering of Advanced Materials, Key Laboratory of Structure and Functional Regulation of Hybrid Materials of Ministry of Education, Department of Chemistry and Anhui Province Key Laboratory of Chemistry for Inorganic/Organic Hybrid Functionalized Materials, Anhui University, Hefei, Anhui 230601, China.

<sup>b</sup> Institute of Chemical Sciences, University of Peshawar, Pakistan.

<sup>c</sup> Sino-Bright School No 8 Beijing, 129 South 4th Ring, FengTai District Beijing, 100005, China.

<sup>d</sup> Department of Chemistry, University of Turbat, Turbat, Balochistan, Pakistan

<sup>e</sup> Institutes of Physical Science and Information Technology, Anhui University, Hefei, Anhui, 230601, China

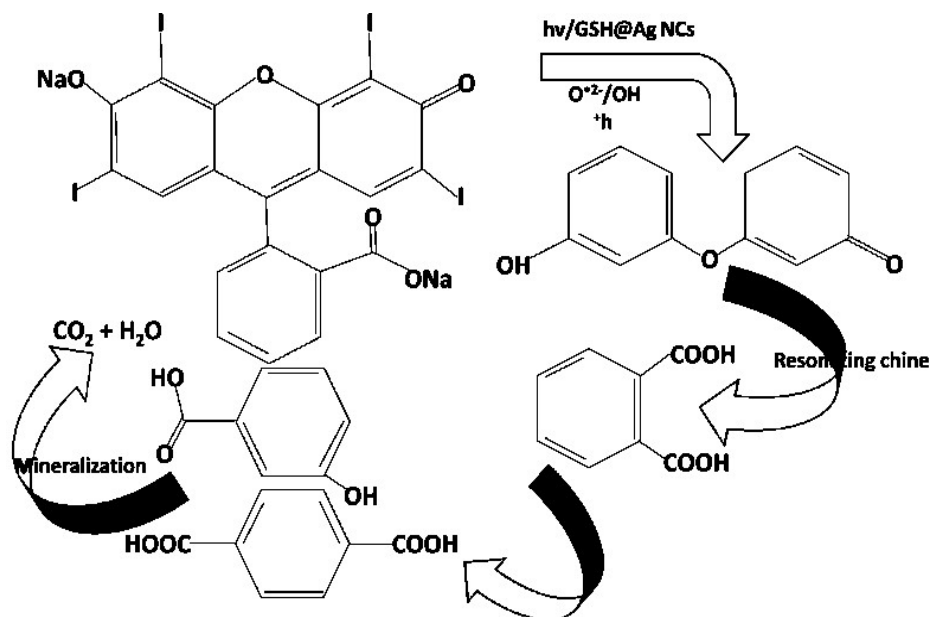

**Fig. S1** Possible fact and propose mechanism for erythrosine B in the presence of GSH@Ag NCs.

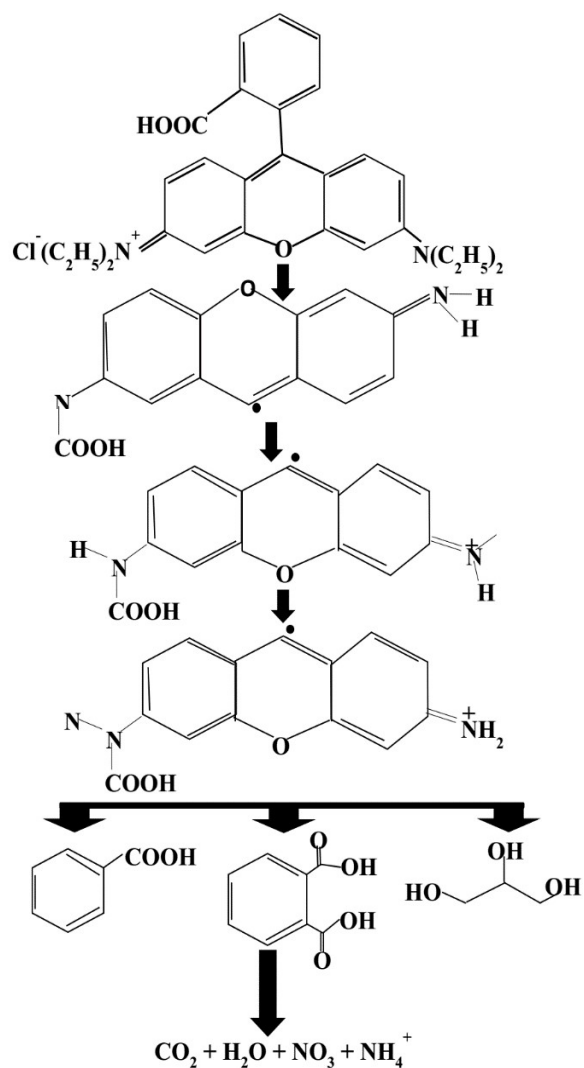

**Fig. S2** Possible mechanism of photocatalytic discoloration pathway for the photocatalytic degradation of rhodamine B dye under solar light irradiation.
